# Supplementary material
Source: Springer Nature journal article supplement (https://www.springermedizin.de/resource/supplementary/12889_2011_3562_MOESM6_ESM.pdf/9489332)
Supplement: MOESM6 [file 9489332]

**Table 2: Outcomes for studies on IMCI**

| Type of outcome         | Study                       | Measure                                                                                                                                                                        | Outcome (IMCI vs. Control area)                                                                                                                |
|-------------------------|-----------------------------|--------------------------------------------------------------------------------------------------------------------------------------------------------------------------------|------------------------------------------------------------------------------------------------------------------------------------------------|
| Health outcomes         | Armstrong Schellenberg 2005 | Death rate per 1000 child years.<br><br>Carer of child prescribed oral medication reports correctly how to give treatment.                                                     | From 27.2 to 24.4 vs. from 27.0 to 28.2, (p=0.28)<br><br>163/225 (72%) vs. 100/179 (56%), (p=0.02)                                             |
|                         | Armstrong Schellenberg 2005 | Children checked for presence of cough, diarrhoea and fever.<br><br>Children correctly classified.<br><br>Correct prescription of oral antibiotics and/or oral anti-malarials. | 219/231 (95%) vs. 67/188 (36%), (p<0.0001)<br><br>139/219 (63%) vs. 66/176 (38%), (p<0.0001)<br><br>159/219 (73%) vs. 63/178 (35%), (p<0.0001) |
| Quality of care         | El-Arifeen 2004             | Mean index of correct treatment and counselling.                                                                                                                               | From 8 to 54 vs. from 5 to 9, (p<0.001)                                                                                                        |
| Utilisation of services | Armstrong Schellenberg 2005 | Change in appropriate care seeking behaviour.                                                                                                                                  | From 211/512 (41%) to 203/531 (38%) vs. from 209/502 (42%) to 138/427 (30%), (p=0.45)                                                          |
|                         | El-Arifeen 2004             | Ill children taken to a health facility or health worker.                                                                                                                      | From 10% to 19% vs. from 6% to 9%                                                                                                              |
| Cost                    | Adam 2005                   | Annualised cost of care.                                                                                                                                                       | US\$ 11.19 vs. US\$ 16.09                                                                                                                      |
|                         | Bryce 2005                  | Cost per child visit managed correctly.                                                                                                                                        | US\$ 4.02 vs. US\$ 25.70                                                                                                                       |
